# Supplementary material for: Cardiovascular Outcomes of Type 2 Diabetic Patients Treated With DPP‑4 Inhibitors Versus Sulphonylureas As Add-on to Metformin in Clinical Practice
Source: Research Square preprint supplement (doi:10.21203/rs.3.rs-575651/v1), 2021-06-08
Supplement: Supplementary file 1 [file 886046c8b588ebbeb586fc2d.docx]

# Supplemental Material

## Appendix A: Flowchart of the study sample

Individuals between 2008-2017 who were on metformin and went onto have second-line add on treatment, fulfilling inclusion and exclusion criteria of the study **(N=32,820)**

**Removed** cases with other second-line add on treatment than Sulphonylureas or DPP-4 inhibitors:

Thiazolidinediones (N=2,363, **7.2%** of 32,820)

Insulin (N=984, **3.0%** of 32,820)

GLP-1 analogues (N=605, **1.8%** of 32,820)

SGLT-2 inhibitors (N=475, **1.4%** of 32,820)

Cases **removed** due to missing data*, for performing a complete case analysis:

Missing data in HbA1c (N= 2,665, **8.1%** of 32,820)

Missing data in systolic blood pressure (N= 560, **1.7%** of 32,820)

Missing data in weight (N= 1,331, **4.1%** of 32,820)

Study Cohort (**N=** **23,837)**

*(*) Smoking is a binary variable showing current and non-current smokers (i.e., ex-smoker or never smoker) and missing data on smoking were recoded as non-current smoker. This approach resulted in a prevalence of current smoker consistent with others reported elsewhere [[1]](#footnote-1),[[2]](#footnote-2).*

## Appendix B: Kaplan Meier curves with risk tables for Figure 2.


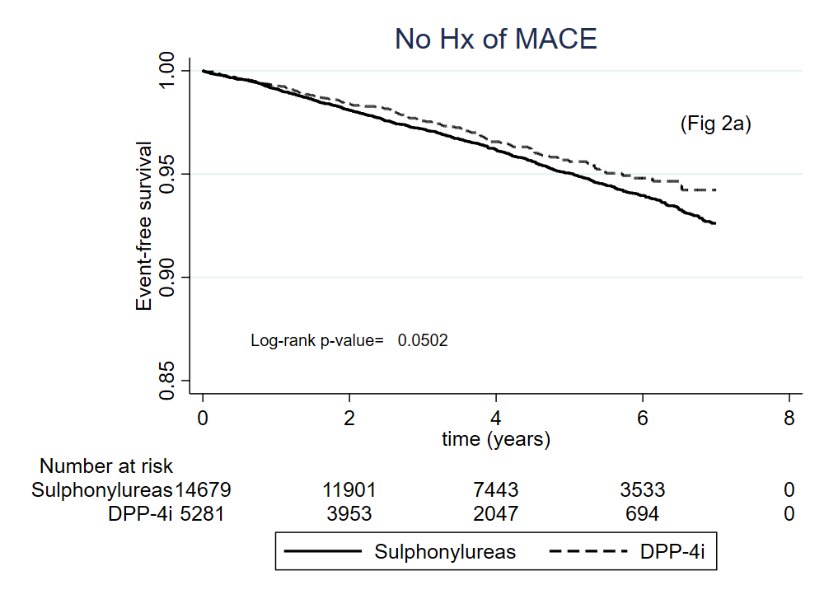

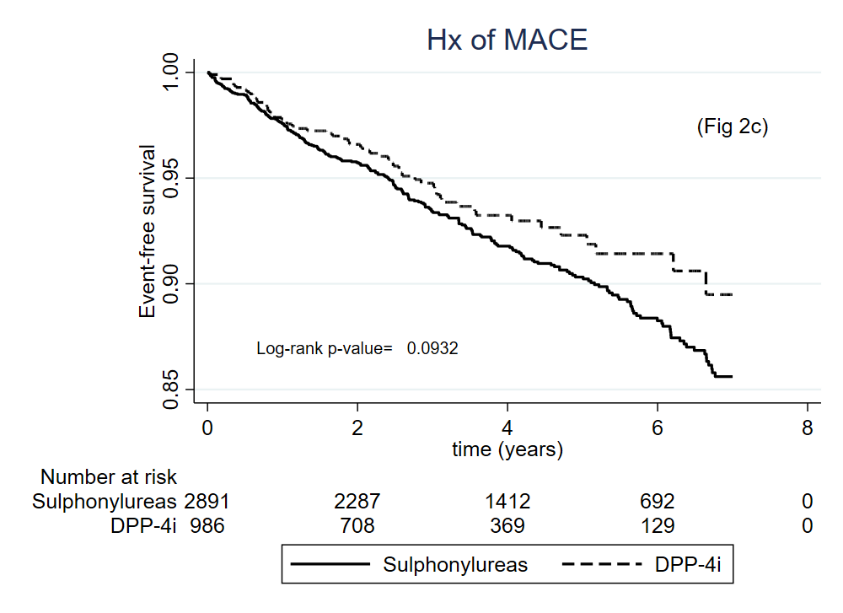

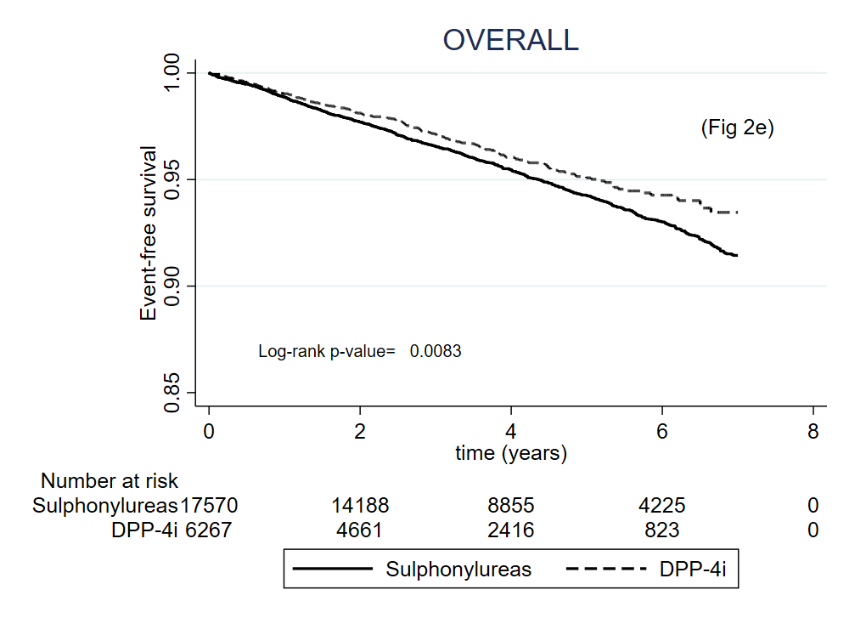


## Appendix C: Sensitivity Analysis for Figure 2 (including all-cause mortality in MACE)

Sensitivity Analysis for Figure 2. Cox regression survival predictions on major adverse cardiovascular events (MACE) and all-cause mortality (composite outcome), comparing Sulphonylureas and DPP-4i cohorts for people with no history of MACE (No Hx of MACE), with history of MACE (Hx of MACE) and overall, unadjusted (left column: Fig 2a, Fig 2c, Fig 2e) and adjusted for baseline covariates (right column: Fig 2b, Fig 2d, Fig 2f). Event-free survival over time, hazard ratios with 95% confidence intervals and p-values are reported.

1. *Patorno E, Goldfine AB, Schneeweiss S, Everett BM, Glynn RJ, Liu J, Kim SC. Cardiovascular outcomes associated with canagliflozin versus other non-gliflozin antidiabetic drugs: population based cohort study. Bmj. 2018 Feb 6;360.* [↑](#footnote-ref-1)
2. *Hippisley-Cox J, Coupland C. Diabetes treatments and risk of heart failure, cardiovascular disease, and all cause mortality: cohort study in primary care. bmj. 2016 Jul 13;354.* [↑](#footnote-ref-2)
